# Supplementary material for: Sexual Dimorphism in Lipid Metabolism and Gut Microbiota in Mice Fed a High-Fat Diet
Source: MDPI journal article supplement (doi:10.3390/nu15092175), 2023-05-02
Supplement: s1 [file s1]

**Supplemental figures:**

**Figure S1:** Body weight changes of the mice during the four-week feeding period with LFD (A) and HFD (B). No significant difference was found within each group before and after the consumption of individual diets.

**Figure S2:** Comparison of plasma NEFA (A, B) levels among CV and GF mice after Week 4 feeding with LFD and HFD, respectively. Values are expressed as means  $\pm$  SEM.  $^*P < 0.05$ , comparison of CV male mice to female mice.

**Figure S3:** Comparison of lipid absorption among CV and GF mice after Week 4 feeding with LFD and HFD, respectively. Values are expressed as means  $\pm$  SEM.

**Figure S4:** Comparison of plasma APOE levels in the mice after LFD and HFD feeding for 4 weeks. Values are expressed as means  $\pm$  SEM.

Supplemental Figures

Figure S1:

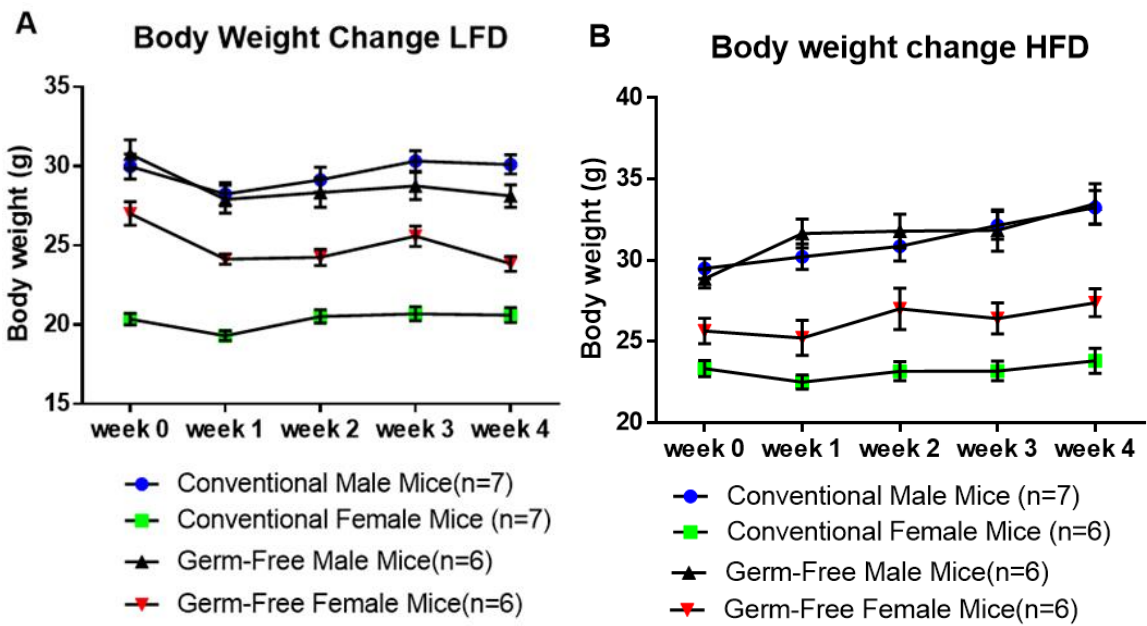

Figure S2:

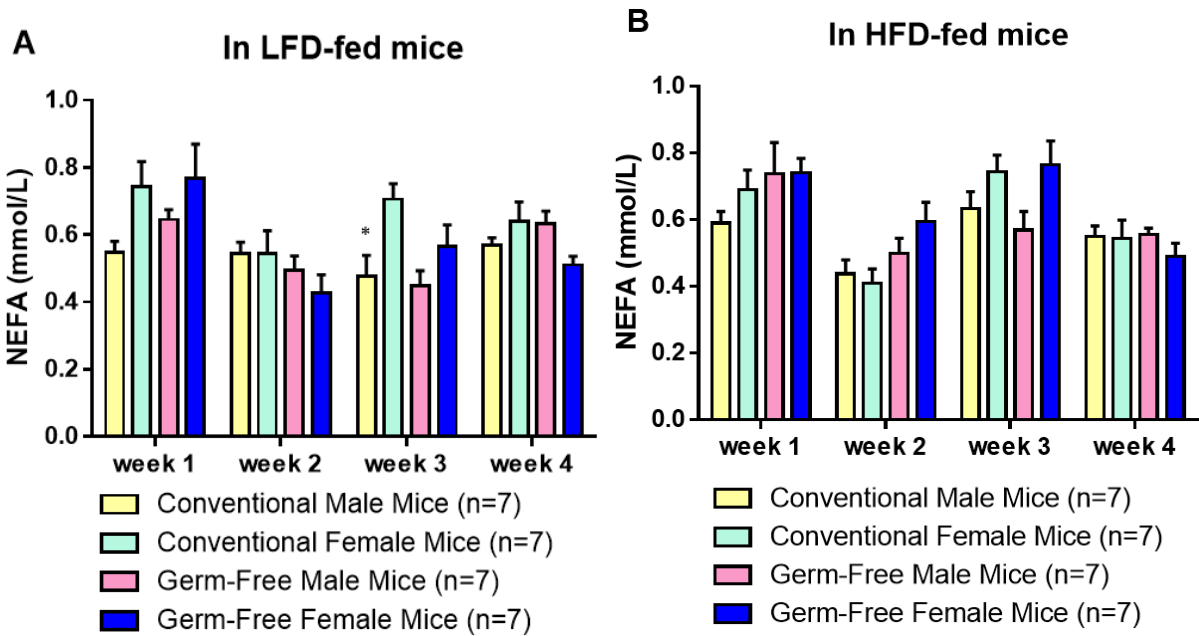

## Supplemental Figures

Figure S3

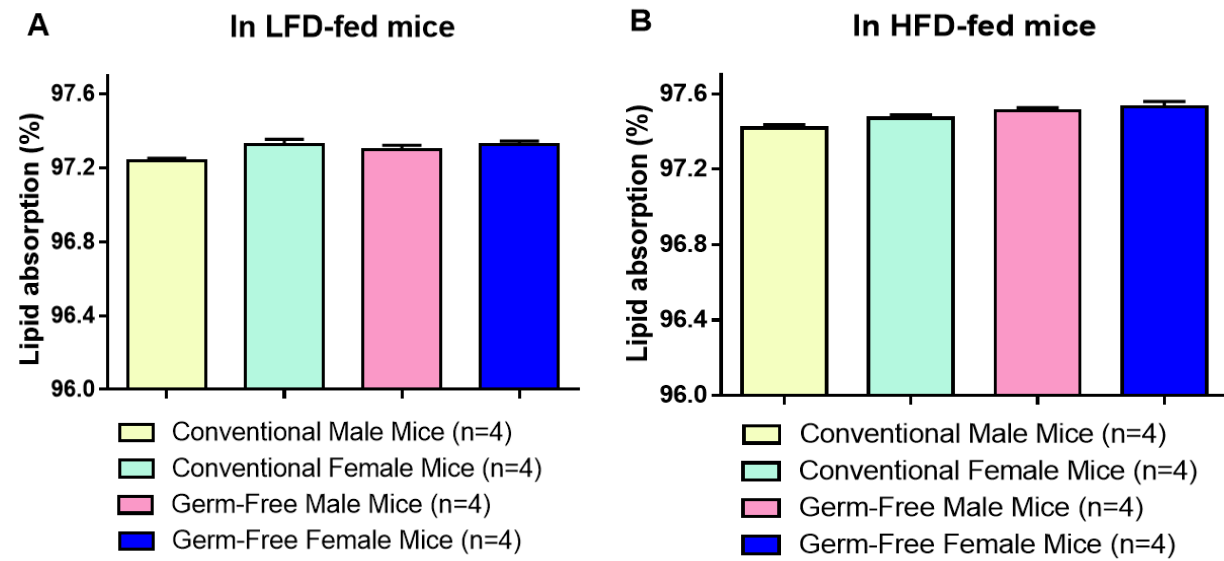

## Supplemental Figures

Figure S4

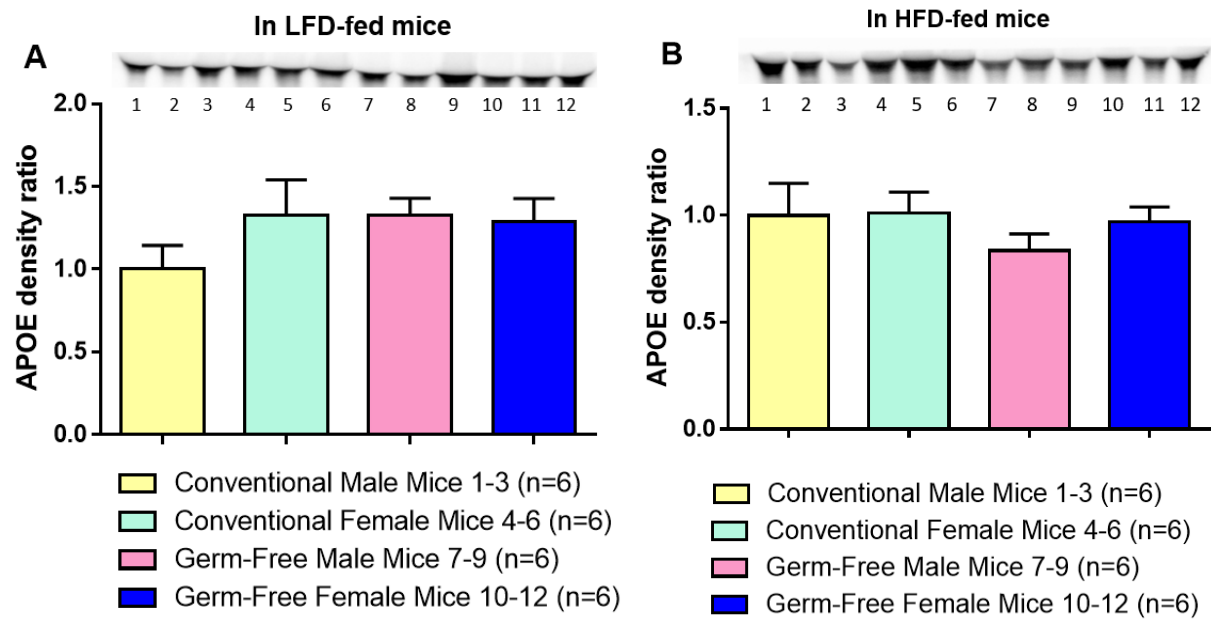

**Supplemental Table S1. Alpha-diversity according to time and sex**

| Alpha diversity                       | Week-0        | Week-4       | P-value for wk-0/wk-4 difference | P-value for week by sex interaction* |
|---------------------------------------|---------------|--------------|----------------------------------|--------------------------------------|
| <b>Observed</b>                       |               |              |                                  |                                      |
| Female                                | 83.67 (20.21) | 85.50 (9.73) | 0.845                            | 0.026                                |
| Male                                  | 99.67 (16.26) | 79.83 (6.65) | 0.020                            |                                      |
| <b>Shannon Index</b>                  |               |              |                                  |                                      |
| Female                                | 3.24 (0.40)   | 3.25 (0.28)  | 0.168                            | 0.013                                |
| Male                                  | 3.76 (0.17)   | 3.33 (0.23)  | 0.004                            |                                      |
| <b>Faith's Phylogenetic Diversity</b> |               |              |                                  |                                      |
| Female                                | 9.84 (1.64)   | 10.41 (0.61) | 0.447                            | 0.044                                |
| Male                                  | 10.94 (0.96)  | 9.67 (0.40)  | 0.029                            |                                      |

Notes. P-values obtained from linear mixed effects regression. Values at week 0 and week 4 reflect the mean (standard deviation).

**Supplemental Table S2. The difference in the relative abundance of genus-level phylotypes in female mice at Week 4 when compared to Week 0 (before HFD feeding)**

| Genus           | baseMean    | log2FoldChange | lfcSE    | stat       | pvalue   | padj     | reject | df   |
|-----------------|-------------|----------------|----------|------------|----------|----------|--------|------|
| Anaerostipes    | 2453.355972 | -1.999488      | 0.145847 | -13.709514 | 8.27E-08 | 1.90E-06 | TRUE   | 10.0 |
| Lactococcus     | 6187.902464 | 3.719104       | 0.163698 | 22.719274  | 1.04E-06 | 1.19E-05 | TRUE   | 5.6  |
| Clostridium     | 3603.687518 | 2.403466       | 0.326781 | 7.354974   | 2.44E-05 | 1.87E-04 | TRUE   | 10.0 |
| Akkermansia     | 42954.88472 | 4.195634       | 0.506415 | 8.284968   | 2.00E-04 | 0.00115  | TRUE   | 5.8  |
| Adlercreutzia   | 10614.10675 | -0.925339      | 0.089366 | -10.354521 | 5.32E-04 | 0.00245  | TRUE   | 3.9  |
| Oscillospira    | 238644.4629 | 0.858399       | 0.117261 | 7.320416   | 0.001620 | 0.0062   | TRUE   | 4.1  |
| Anaeroplasm     | 11461.37974 | -2.005654      | 0.470646 | -4.261491  | 0.005610 | 0.01843  | TRUE   | 5.9  |
| Coproccoccus    | 25097.41256 | -0.530003      | 0.157667 | -3.361535  | 0.007220 | 0.02077  | TRUE   | 10.0 |
| Ruminococcus    | 43383.19318 | -0.631346      | 0.156927 | -4.023179  | 0.008300 | 0.0212   | TRUE   | 5.5  |
| Staphylococcus  | 176.088433  | 0.211941       | 0.060671 | 3.493286   | 0.015920 | 0.02817  | TRUE   | 5.3  |
| Enterococcus    | 176.088433  | 0.211941       | 0.060671 | 3.493286   | 0.015920 | 0.02817  | TRUE   | 5.3  |
| Coprobacillus   | 176.088433  | 0.211941       | 0.060671 | 3.493286   | 0.015920 | 0.02817  | TRUE   | 5.3  |
| Blautia         | 176.088433  | 0.211941       | 0.060671 | 3.493286   | 0.015920 | 0.02817  | TRUE   | 5.3  |
| Roseburia       | 275.100344  | 0.214572       | 0.066373 | 3.232818   | 0.032360 | 0.05316  | FALSE  | 4.0  |
| [Ruminococcus]  | 68861.3206  | -0.460339      | 0.163726 | -2.811645  | 0.044950 | 0.06892  | FALSE  | 4.3  |
| Lactobacillus   | 105094.7944 | -0.902418      | 0.476608 | -1.893417  | 0.124230 | 0.17858  | FALSE  | 4.4  |
| Dehalobacterium | 6973.915896 | 0.629383       | 0.359457 | 1.750929   | 0.144500 | 0.1955   | FALSE  | 4.7  |
| Bacteroides     | 358856.4558 | -0.270255      | 0.198642 | -1.360515  | 0.227690 | 0.29093  | FALSE  | 5.4  |
| Desulfovibrio   | 309.85493   | 1.048745       | 0.846668 | 1.238672   | 0.243750 | 0.29507  | FALSE  | 10.0 |
| Butyrivibrio    | 698.035366  | -0.743471      | 0.731283 | -1.016668  | 0.333280 | 0.38327  | FALSE  | 10.0 |
| Turicibacter    | 65010.97271 | -0.430061      | 0.520448 | -0.826329  | 0.444380 | 0.4867   | FALSE  | 5.3  |
| Sutterella      | 8303.343243 | 0.008513       | 0.653779 | 0.013021   | 0.990030 | 0.99003  | FALSE  | 6.0  |
| Dorea           | 511.467255  | -0.009764      | 0.706317 | -0.013823  | 0.989240 | 0.99003  | FALSE  | 10.0 |

Abbreviations: lfcSE, log2FoldChange standard error; padj, FDR corrected p-value; df, degrees of freedom.

Notes. Estimates were obtained from bias-corrected centered log2-ratio transformed regression as implemented in LinDA.

baseMean reflects the normalized average read count. Stat is the log2FoldChange / lfcSE.

Model degrees of freedom computed using the Satterthwaite approximation as implemented in lmerTest.

# Supplemental Table S3. The difference in the relative abundance of amplicon sequence variants (ASV) in female mice at Week 4 compared to Week 0 in response to the HFD.

| ASV    | baseMean   | log2FoldChange | lfcSE      | stat        | pvalue   | padj     | df    | kingdom  | Phylum        | Class       | Order       | Family            | Genus           | Species |
|--------|------------|----------------|------------|-------------|----------|----------|-------|----------|---------------|-------------|-------------|-------------------|-----------------|---------|
| ASV12  | 16.6182162 | -1.32549472    | 0.51434979 | -20.1534517 | 1.05E-05 | 0.20E-05 | 10    | Bacteria | Firmicutes    | Chloridia   | Chloridia   | Ruminococcaceae   | Ruminococcus    |         |
| ASV30  | 17.9464508 | -1.44217655    | 0.51035117 | -15.4070764 | 5.6E-07  | 1.42E-07 | 10    | Bacteria | Firmicutes    | Chloridia   | Chloridia   | Ruminococcaceae   | Ruminococcus    |         |
| ASV13  | 19.2440013 | 0.16887661     | 0.24232667 | 15.682208   | 8.43E-08 | 1.95E-08 | 10    | Bacteria | Firmicutes    | Chloridia   | Chloridia   |                   |                 |         |
| ASV21  | 18.5524549 | 0.25543491     | 0.25543491 | 10.200094   | 1.05E-05 | 1.05E-05 | 10    | Bacteria | Firmicutes    | Chloridia   | Chloridia   | Actinospiraceae   | Coprococcus     |         |
| ASV34  | 18.5752445 | 0.00202619     | 0.36029757 | 10.8435666  | 7.54E-07 | 2.42E-07 | 10    | Bacteria | Firmicutes    | Chloridia   | Chloridia   | Ruminococcaceae   |                 |         |
| ASV95  | 12.0212271 | 1.70524298     | 0.56892047 | 10.8607741  | 1.48E-05 | 1.48E-05 | 10    | Bacteria | Firmicutes    | Chloridia   | Chloridia   | Ruminococcaceae   |                 |         |
| ASV104 | 42.9672573 | 1.37795162     | 0.36738209 | 11.3957327  | 3.41E-05 | 5.35E-05 | 10    | Bacteria | Firmicutes    | Chloridia   | Chloridia   | Ruminococcaceae   |                 |         |
| ASV24  | 27.5354545 | 1.14881072     | 0.11889358 | 35.2418861  | 5.32E-06 | 1.87E-05 | 1,848 | Bacteria | Firmicutes    | Chloridia   | Chloridia   | Ruminococcaceae   |                 |         |
| ASV61  | 4.0101081  | 1.14200801     | 0.25543491 | 13.000094   | 1.05E-05 | 1.05E-05 | 10    | Bacteria | Firmicutes    | Chloridia   | Chloridia   | Ruminococcaceae   |                 |         |
| ASV25  | 48.9034343 | 1.63048819     | 0.28812287 | 15.0662131  | 1.45E-05 | 1.95E-05 | 1,288 | Bacteria | Firmicutes    | Chloridia   | Chloridia   | Parvulariellaceae |                 |         |
| ASV41  | 48.9034343 | 1.63048819     | 0.28812287 | 15.0662131  | 1.45E-05 | 1.95E-05 | 1,288 | Bacteria | Firmicutes    | Chloridia   | Chloridia   | Parvulariellaceae |                 |         |
| ASV52  | 13.6143441 | 1.45013129     | 0.31073039 | 15.7728138  | 1.03E-05 | 1.51E-05 | 1,453 | Bacteria | Firmicutes    | Chloridia   | Chloridia   |                   |                 |         |
| ASV163 | 27.1039519 | 1.23481208     | 0.23488806 | 11.0816862  | 5.28E-05 | 4.88E-04 | 5,172 | Bacteria | Firmicutes    | Chloridia   | Chloridia   |                   |                 |         |
| ASV104 | 27.5354545 | 1.14881072     | 0.11889358 | 35.2418861  | 5.32E-06 | 1.87E-05 | 1,848 | Bacteria | Firmicutes    | Chloridia   | Chloridia   | Ruminococcaceae   |                 |         |
| ASV10  | 17.8112118 | 1.17113498     | 0.30809111 | 13.1542121  | 4.03E-05 | 4.98E-05 | 1,768 | Bacteria | Firmicutes    | Chloridia   | Chloridia   | Actinospiraceae   |                 |         |
| ASV30  | 17.9464508 | 1.13381171     | 0.14481113 | 14.0811133  | 5.05E-05 | 4.98E-04 | 4,579 | Bacteria | Firmicutes    | Chloridia   | Chloridia   | Ruminococcaceae   |                 |         |
| ASV146 | 16.1154517 | 1.30417608     | 0.31313881 | 8.40110077  | 1.13E-04 | 0.001102 | 10    | Bacteria | Firmicutes    | Chloridia   | Chloridia   |                   |                 |         |
| ASV158 | 10.0140011 | 1.69516661     | 0.34047905 | 8.11960564  | 1.18E-04 | 0.001021 | 1,009 | Bacteria | Firmicutes    | Chloridia   | Chloridia   | Actinospiraceae   | Coprococcus     |         |
| ASV27  | 18.6144154 | 1.28134219     | 0.18111115 | 15.5151204  | 1.44E-04 | 0.001108 | 1,768 | Bacteria | Firmicutes    | Chloridia   | Chloridia   | Ruminococcaceae   | Ruminococcus    |         |
| ASV13  | 21.1312784 | 1.13780167     | 0.14018309 | 5.54820106  | 1.48E-04 | 0.001108 | 10    | Bacteria | Firmicutes    | Chloridia   | Chloridia   | Actinospiraceae   |                 |         |
| ASV19  | 63.2136946 | 1.45401112     | 0.28871143 | 13.4174179  | 1.77E-04 | 0.001171 | 4,056 | Bacteria | Bacteroidetes | Bacteroidia | Bacteroidia | Rikenellaceae     |                 |         |
| ASV28  | 14.6151767 | 1.26016661     | 0.31386187 | 8.4020166   | 1.46E-04 | 0.001171 | 10    | Bacteria | Firmicutes    | Chloridia   | Chloridia   |                   |                 |         |
| ASV158 | 10.0140011 | 1.69516661     | 0.34047905 | 8.11960564  | 1.18E-04 | 0.001171 | 1,009 | Bacteria | Firmicutes    | Chloridia   | Chloridia   | Actinospiraceae   | Coprococcus     |         |
| ASV281 | 13.8136472 | 1.04217137     | 0.50531307 | 5.2328433   | 3.00E-04 | 0.001171 | 10    | Bacteria | Firmicutes    | Chloridia   | Chloridia   | Actinospiraceae   | Ruminococcaceae |         |
| ASV159 | 11.7157002 | 1.50380892     | 0.55848902 | 4.08E-04    | 0.001242 | 0.001242 | 10    | Bacteria | Firmicutes    | Chloridia   | Chloridia   | Actinospiraceae   | Ruminococcaceae |         |
| ASV12  | 12.4510206 | 1.26241401     | 0.57369514 | 4.78588267  | 3.04E-04 | 0.001278 | 5,686 | Bacteria | Firmicutes    | Chloridia   | Chloridia   | Actinospiraceae   |                 |         |
| ASV26  | 12.1254717 | 1.46216661     | 0.2345452  | 11.2461763  | 4.18E-04 | 0.001299 | 1,848 | Bacteria | Firmicutes    | Chloridia   | Chloridia   | Actinospiraceae   |                 |         |
| ASV19  | 63.2136946 | 1.45401112     | 0.28871143 | 13.4174179  | 1.77E-04 | 0.001371 | 4,056 | Bacteria | Bacteroidetes | Bacteroidia | Bacteroidia | Rikenellaceae     |                 |         |
| ASV28  | 14.6151767 | 1.26016661     | 0.31386187 | 8.4020166   | 1.46E-04 | 0.001371 | 1,009 | Bacteria | Firmicutes    | Chloridia   | Chloridia   |                   |                 |         |
| ASV158 | 10.0140011 | 1.69516661     | 0.34047905 | 8.11960564  | 1.18E-04 | 0.001371 | 1,009 | Bacteria | Firmicutes    | Chloridia   | Chloridia   | Actinospiraceae   | Coprococcus     |         |
| ASV281 | 13.8136472 | 1.04217137     | 0.50531307 | 5.2328433   | 3.00E-04 | 0.001371 | 10    | Bacteria | Firmicutes    | Chloridia   | Chloridia   | Actinospiraceae   | Ruminococcaceae |         |
| ASV159 | 11.7157002 | 1.50380892     | 0.55848902 | 4.08E-04    | 0.001371 | 0.001371 | 10    | Bacteria | Firmicutes    | Chloridia   | Chloridia   | Actinospiraceae   | Ruminococcaceae |         |
| ASV12  | 12.4510206 | 1.26241401     | 0.57369514 | 4.78588267  | 3.04E-04 | 0.001371 | 5,686 | Bacteria | Firmicutes    | Chloridia   | Chloridia   | Actinospiraceae   |                 |         |
| ASV26  | 12.1254717 | 1.46216661     | 0.2345452  | 11.2461763  | 4.18E-04 | 0.001371 | 1,848 | Bacteria | Firmicutes    | Chloridia   | Chloridia   | Actinospiraceae   |                 |         |
| ASV19  | 63.2136946 | 1.45401112     | 0.28871143 | 13.4174179  | 1.77E-04 | 0.001371 | 4,056 | Bacteria | Bacteroidetes | Bacteroidia | Bacteroidia | Rikenellaceae     |                 |         |
| ASV28  | 14.6151767 | 1.26016661     | 0.31386187 | 8.4020166   | 1.46E-04 | 0.001371 | 1,009 | Bacteria | Firmicutes    | Chloridia   | Chloridia   |                   |                 |         |
| ASV158 | 10.0140011 | 1.69516661     | 0.34047905 | 8.11960564  | 1.18E-04 | 0.001371 | 1,009 | Bacteria | Firmicutes    | Chloridia   | Chloridia   | Actinospiraceae   | Coprococcus     |         |
| ASV281 | 13.8136472 | 1.04217137     | 0.50531307 | 5.2328433   | 3.00E-04 | 0.001371 | 10    | Bacteria | Firmicutes    | Chloridia   | Chloridia   | Actinospiraceae   | Ruminococcaceae |         |
| ASV159 | 11.7157002 | 1.50380892     | 0.55848902 | 4.08E-04    | 0.001371 | 0.001371 | 10    | Bacteria | Firmicutes    | Chloridia   | Chloridia   | Actinospiraceae   | Ruminococcaceae |         |
| ASV12  | 12.4510206 | 1.26241401     | 0.57369514 | 4.78588267  | 3.04E-04 | 0.001371 | 5,686 | Bacteria | Firmicutes    | Chloridia   | Chloridia   | Actinospiraceae   |                 |         |
| ASV26  | 12.1254717 | 1.46216661     | 0.2345452  | 11.2461763  | 4.18E-04 | 0.001371 | 1,848 | Bacteria | Firmicutes    | Chloridia   | Chloridia   | Actinospiraceae   |                 |         |
| ASV19  | 63.2136946 | 1.45401112     | 0.28871143 | 13.4174179  | 1.77E-04 | 0.001371 | 4,056 | Bacteria | Bacteroidetes | Bacteroidia | Bacteroidia | Rikenellaceae     |                 |         |
| ASV28  | 14.6151767 | 1.26016661     | 0.31386187 | 8.4020166   | 1.46E-04 | 0.001371 | 1,009 | Bacteria | Firmicutes    | Chloridia   | Chloridia   |                   |                 |         |
| ASV158 | 10.0140011 | 1.69516661     | 0.34047905 | 8.11960564  | 1.18E-04 | 0.001371 | 1,009 | Bacteria | Firmicutes    | Chloridia   | Chloridia   | Actinospiraceae   | Coprococcus     |         |
| ASV281 | 13.8136472 | 1.04217137     | 0.50531307 | 5.2328433   | 3.00E-04 | 0.001371 | 10    | Bacteria | Firmicutes    | Chloridia   | Chloridia   | Actinospiraceae   | Ruminococcaceae |         |
| ASV159 | 11.7157002 | 1.50380892     | 0.55848902 | 4.08E-04    | 0.001371 | 0.001371 | 10    | Bacteria | Firmicutes    | Chloridia   | Chloridia   | Actinospiraceae   | Ruminococcaceae |         |
| ASV12  | 12.4510206 | 1.26241401     | 0.57369514 | 4.78588267  | 3.04E-04 | 0.001371 | 5,686 | Bacteria | Firmicutes    | Chloridia   | Chloridia   | Actinospiraceae   |                 |         |
| ASV26  | 12.1254717 | 1.46216661     | 0.2345452  | 11.2461763  | 4.18E-04 | 0.001371 | 1,848 | Bacteria | Firmicutes    | Chloridia   | Chloridia   | Actinospiraceae   |                 |         |
| ASV19  | 63.2136946 | 1.45401112     | 0.28871143 | 13.4174179  | 1.77E-04 | 0.001371 | 4,056 | Bacteria | Bacteroidetes | Bacteroidia | Bacteroidia | Rikenellaceae     |                 |         |
| ASV28  | 14.6151767 | 1.26016661     | 0.31386187 | 8.4020166   | 1.46E-04 | 0.001371 | 1,009 | Bacteria | Firmicutes    | Chloridia   | Chloridia   |                   |                 |         |
| ASV158 | 10.0140011 | 1.69516661     | 0.34047905 | 8.11960564  | 1.18E-04 | 0.001371 | 1,009 | Bacteria | Firmicutes    | Chloridia   | Chloridia   | Actinospiraceae   | Coprococcus     |         |
| ASV281 | 13.8136472 | 1.04217137     | 0.50531307 | 5.2328433   | 3.00E-04 | 0.001371 | 10    | Bacteria | Firmicutes    | Chloridia   | Chloridia   | Actinospiraceae   | Ruminococcaceae |         |
| ASV159 | 11.7157002 | 1.50380892     | 0.55848902 | 4.08E-04    | 0.001371 | 0.001371 | 10    | Bacteria | Firmicutes    | Chloridia   | Chloridia   | Actinospiraceae   | Ruminococcaceae |         |
| ASV12  | 12.4510206 | 1.26241401     | 0.57369514 | 4.78588267  | 3.04E-04 | 0.001371 | 5,686 | Bacteria | Firmicutes    | Chloridia   | Chloridia   | Actinospiraceae   |                 |         |
| ASV26  | 12.1254717 | 1.46216661     | 0.2345452  | 11.2461763  | 4.18E-04 | 0.001371 | 1,848 | Bacteria | Firmicutes    | Chloridia   | Chloridia   | Actinospiraceae   |                 |         |
| ASV19  | 63.2136946 | 1.45401112     | 0.28871143 | 13.4174179  | 1.77E-04 | 0.001371 | 4,056 | Bacteria | Bacteroidetes | Bacteroidia | Bacteroidia | Rikenellaceae     |                 |         |
| ASV28  | 14.6151767 | 1.26016661     | 0.31386187 | 8.4020166   | 1.46E-04 | 0.001371 | 1,009 | Bacteria | Firmicutes    | Chloridia   | Chloridia   |                   |                 |         |
| ASV158 | 10.0140011 | 1.69516661     | 0.34047905 | 8.11960564  | 1.18E-04 | 0.001371 | 1,009 | Bacteria | Firmicutes    | Chloridia   | Chloridia   | Actinospiraceae   | Coprococcus     |         |
| ASV281 | 13.8136472 | 1.04217137     | 0.50531307 | 5.2328433   | 3.00E-04 | 0.001371 | 10    | Bacteria | Firmicutes    | Chloridia   | Chloridia   | Actinospiraceae   | Ruminococcaceae |         |
| ASV159 | 11.7157002 | 1.50380892     | 0.55848902 | 4.08E-04    | 0.001371 | 0.001371 | 10    | Bacteria | Firmicutes    | Chloridia   | Chloridia   | Actinospiraceae   | Ruminococcaceae |         |
| ASV12  | 12.4510206 | 1.26241401     | 0.57369514 | 4.78588267  | 3.04E-04 | 0.001371 | 5,686 | Bacteria | Firmicutes    | Chloridia   | Chloridia   | Actinospiraceae   |                 |         |
| ASV26  | 12.1254717 | 1.46216661     | 0.2345452  | 11.2461763  | 4.18E-04 | 0.001371 | 1,848 | Bacteria | Firmicutes    | Chloridia   | Chloridia   | Actinospiraceae   |                 |         |
| ASV19  | 63.2136946 | 1.45401112     | 0.28871143 | 13.4174179  | 1.77E-04 | 0.001371 | 4,056 | Bacteria | Bacteroidetes | Bacteroidia | Bacteroidia | Rikenellaceae     |                 |         |
| ASV28  | 14.6151767 | 1.26016661     | 0.31386187 | 8.4020166   | 1.46E-04 | 0.001371 | 1,009 | Bacteria | Firmicutes    | Chloridia   | Chloridia   |                   |                 |         |
| ASV158 | 10.0140011 | 1.69516661     | 0.34047905 | 8.11960564  | 1.18E-04 | 0.001371 | 1,009 | Bacteria | Firmicutes    | Chloridia   | Chloridia   | Actinospiraceae   | Coprococcus     |         |
| ASV281 | 13.8136472 | 1.04217137     | 0.50531307 | 5.2328433   | 3.00E-04 | 0.001371 | 10    | Bacteria | Firmicutes    | Chloridia   | Chloridia   | Actinospiraceae   | Ruminococcaceae |         |
| ASV159 | 11.7157002 | 1.50380892     | 0.55848902 | 4.08E-04    | 0.001371 | 0.001371 | 10    | Bacteria | Firmicutes    | Chloridia   | Chloridia   | Actinospiraceae   | Ruminococcaceae |         |
| ASV12  | 12.4510206 | 1.26241401     | 0.57369514 | 4.78588267  | 3.04E-04 | 0.001371 | 5,686 | Bacteria | Firmicutes    | Chloridia   | Chloridia   | Actinospiraceae   |                 |         |
| ASV26  | 12.1254717 | 1.46216661     | 0.2345452  | 11.2461763  | 4.18E-04 | 0.001371 | 1,848 | Bacteria | Firmicutes    | Chloridia   | Chloridia   | Actinospiraceae   |                 |         |
| ASV19  | 63.2136946 | 1.45401112     | 0.28871143 | 13.4174179  | 1.77E-04 | 0.001371 | 4,056 | Bacteria | Bacteroidetes | Bacteroidia | Bacteroidia | Rikenellaceae     |                 |         |
| ASV28  | 14.6151767 | 1.26016661     | 0.31386187 | 8.4020166   | 1.46E-04 | 0.001371 | 1,009 | Bacteria | Firmicutes    | Chloridia   | Chloridia   |                   |                 |         |
| ASV158 | 10.0140011 | 1.69516661     | 0.34047905 | 8.11960564  | 1.18E-04 | 0.001371 | 1,009 | Bacteria | Firmicutes    | Chloridia   | Chloridia   | Actinospiraceae   | Coprococcus     |         |
| ASV281 | 13.8136472 | 1.04217137     | 0.50531307 | 5.2328433   | 3.00E-04 | 0.001371 | 10    | Bacteria | Firmicutes    | Chloridia   | Chloridia   | Actinospiraceae   | Ruminococcaceae |         |
| ASV159 | 11.7157002 | 1.50380892     | 0.55848902 | 4.08E-04    | 0.001371 | 0.001371 | 10    | Bacteria | Firmicutes    | Chloridia   | Chloridia   | Actinospiraceae   | Ruminococcaceae |         |
| ASV12  | 12.4510206 | 1.26241401     | 0.57369514 | 4.78588267  | 3.04E-04 | 0.001371 | 5,686 | Bacteria | Firmicutes    | Chloridia   | Chloridia   | Actinospiraceae   |                 |         |
| ASV26  | 12.1254717 | 1.46216661     | 0.2345452  | 11.2461763  | 4.18E-04 | 0.001371 | 1,848 | Bacteria | Firmicutes    | Chloridia   | Chloridia   | Actinospiraceae   |                 |         |
| ASV19  | 63.2136946 | 1.45401112     | 0.28871143 | 13.4174179  | 1.77E-04 | 0.001371 | 4,056 | Bacteria | Bacteroidetes | Bacteroidia | Bacteroidia | Rikenellaceae     |                 |         |
| ASV28  | 14.6151767 | 1.26016661     | 0.31386187 | 8.4020166   |          |          |       |          |               |             |             |                   |                 |         |



**Supplemental Table S4. The difference in the relative abundance of genus-level phylotypes in male mice at Week 4 when compared to Week 0 in response to the HFD**

| Genus           | baseMean        | log2FoldChange | lfcSE      | stat       | pvalue   | padj     | reject | df   |
|-----------------|-----------------|----------------|------------|------------|----------|----------|--------|------|
| Lactococcus     | 5491.38442460   | 4.55486120     | 0.08867090 | 51.3681716 | 5.29E-08 | 1.22E-06 | TRUE   | 5.0  |
| Clostridium     | 2133.50856020   | 3.13027020     | 0.29633800 | 10.5631752 | 9.60E-07 | 1.10E-05 | TRUE   | 10.0 |
| Anaeroplasm     | 4168.37930850   | -3.19225910    | 0.40810930 | -7.8220697 | 1.43E-05 | 1.10E-04 | TRUE   | 10.0 |
| Akkermansia     | 195075.99045190 | 1.26809650     | 0.23833910 | 5.3205568  | 0.003139 | 0.018048 | TRUE   | 5.0  |
| Enterococcus    | 527.39528060    | 1.38349350     | 0.44034960 | 3.1418069  | 0.010478 | 0.042142 | TRUE   | 10.0 |
| Coprococcus     | 51683.11745110  | -0.77813020    | 0.19764840 | -3.9369426 | 0.010994 | 0.042142 | TRUE   | 5.0  |
| Ruminococcus    | 46453.71510560  | -0.96652930    | 0.30122250 | -3.2086889 | 0.023763 | 0.06832  | FALSE  | 5.0  |
| [Ruminococcus]  | 72126.82076120  | -0.77367220    | 0.29018650 | -2.666121  | 0.023649 | 0.06832  | FALSE  | 10.0 |
| Coprobacillus   | 417.43507180    | 1.03116080     | 0.42718020 | 2.4138779  | 0.036441 | 0.093127 | FALSE  | 10.0 |
| Desulfovibrio   | 244.64311870    | 0.22601010     | 0.08786500 | 2.5722422  | 0.049899 | 0.114769 | FALSE  | 5.0  |
| Blautia         | 276.34329210    | 0.40960940     | 0.18607480 | 2.201316   | 0.078963 | 0.165104 | FALSE  | 5.0  |
| Staphylococcus  | 287.96554600    | 0.47168680     | 0.27468230 | 1.7172083  | 0.146589 | 0.280962 | FALSE  | 5.0  |
| Butyrivibrio    | 460.87191480    | -0.72830500    | 0.59477680 | -1.2245013 | 0.248826 | 0.422064 | FALSE  | 10.0 |
| Dorea           | 2354.58664710   | -0.70577650    | 0.55164650 | -1.2794001 | 0.256909 | 0.422064 | FALSE  | 5.0  |
| Sutterella      | 1629.77456360   | -0.39226720    | 0.43140020 | -0.9092885 | 0.404896 | 0.590049 | FALSE  | 5.0  |
| Dehalobacterium | 894.63583960    | 0.11556620     | 0.13142560 | 0.879328   | 0.41947  | 0.590049 | FALSE  | 5.0  |
| Adlercreutzia   | 7480.14960700   | -0.11557830    | 0.13660640 | -0.846068  | 0.436123 | 0.590049 | FALSE  | 5.0  |
| Roseburia       | 333.79253850    | -0.24219580    | 0.42108030 | -0.5751772 | 0.577883 | 0.738406 | FALSE  | 10.0 |
| Turicibacter    | 16249.41135590  | 0.33447830     | 0.63588770 | 0.5260021  | 0.621374 | 0.752189 | FALSE  | 5.0  |
| Lactobacillus   | 14679.22866100  | -0.19319190    | 0.43674320 | -0.4423467 | 0.676717 | 0.778225 | FALSE  | 5.0  |
| Anaerostipes    | 273.47593880    | 0.05812770     | 0.14929630 | 0.3893444  | 0.713052 | 0.780961 | FALSE  | 5.0  |
| Oscillospira    | 289908.86342410 | 0.05410890     | 0.26092290 | 0.2073752  | 0.843898 | 0.882257 | FALSE  | 5.0  |
| Bacteroides     | 286848.51113760 | -0.00920230    | 0.17718000 | -0.0519378 | 0.959601 | 0.959601 | FALSE  | 10.0 |

Abbreviations: lfcSE, log2FoldChange standard error; padj, FDR corrected p-value; df, degrees of freedom.

Notes. Estimates were obtained from bias-corrected centered log2-ratio transformed regression as implemented in LinDA.

baseMean reflects the normalized average read count. Stat is the log2FoldChange / lfcSE.

Model degrees of freedom computed using the Satterthwaite approximation as implemented in lmerTest.

# Supplemental Table S5. The difference in the relative abundance of amplicon sequence variants (ASV) in male mice at Week 4 when compared to Week 0 in response to the HFD

| ASV   | headnum     | log2FoldChange | lfcSE       | stat        | positive | padj     | df   | Kingdom  | Phylum          | Class           | Order              | Family             | Genus              | Species |
|-------|-------------|----------------|-------------|-------------|----------|----------|------|----------|-----------------|-----------------|--------------------|--------------------|--------------------|---------|
| ASV12 | 1618.613262 | 3.32830472     | 0.16148979  | 20.61365317 | 1.56E-05 | 2.26E-07 | 30.0 | Bacteria | Firmicutes      | Chloridia       | Chloridiales       | Chloridiales       |                    |         |
| ASV10 | 1146.46308  | 4.44779683     | 0.16111173  | 38.6979584  | 4.82E-09 | 4.82E-07 | 30.0 | Bacteria | Firmicutes      | Chloridia       | Chloridiales       | Chloridiales       | Chloridiales       |         |
| ASV11 | 1514.45111  | 3.5887616      | 0.25170819  | 13.6127258  | 0.0010   | 1.70E-05 | 30.0 | Bacteria | Firmicutes      | Chloridia       | Chloridiales       | Chloridiales       | Chloridiales       |         |
| ASV17 | 1853.95438  | 2.24869379     | 0.18338353  | 12.14165173 | 2.63E-05 | 0.29E-05 | 30.0 | Bacteria | Firmicutes      | Chloridia       | Chloridiales       | Chloridiales       | Chloridiales       |         |
| ASV14 | 802.724465  | 4.68666624     | 0.26897837  | 10.8418658  | 7.94E-05 | 4.45E-07 | 30.0 | Bacteria | Firmicutes      | Chloridia       | Chloridiales       | Chloridiales       | Chloridiales       |         |
| ASV6  | 1192.12671  | 1.70144208     | 0.18880204  | 10.0007421  | 1.49E-05 | 3.40E-05 | 30.0 | Bacteria | Firmicutes      | Chloridia       | Chloridiales       | Chloridiales       | Chloridiales       |         |
| ASV4  | 2751.54545  | 4.2465051      | 0.1168845   | 39.4241884  | 0.0010   | 0.17E-05 | 30.0 | Bacteria | Firmicutes      | Chloridia       | Chloridiales       | Chloridiales       | Chloridiales       |         |
| ASV1  | 6431.0881   | 3.14658808     | 0.20267247  | 15.6020084  | 1.20E-05 | 1.99E-04 | 5.3  | Bacteria | Firmicutes      | Chloridia       | Chloridiales       | Chloridiales       | Chloridiales       |         |
| ASV5  | 4808.93448  | 3.59148978     | 0.13665923  | 35.3665923  | 1.40E-05 | 1.99E-04 | 5.3  | Bacteria | Firmicutes      | Chloridia       | Chloridiales       | Chloridiales       | Chloridiales       |         |
| ASV41 | 4076.267028 | 1.68111024     | 0.24778411  | 11.20677701 | 1.83E-05 | 2.15E-04 | 5.3  | Bacteria | Firmicutes      | Bacilli         | Lactobacillales    | Streptococcaceae   | Lactococcus        |         |
| ASV13 | 1615.61454  | 4.49019224     | 0.17170928  | 34.17387138 | 1.60E-05 | 3.10E-04 | 5.3  | Bacteria | Firmicutes      | Chloridia       | Chloridiales       | Chloridiales       | Chloridiales       |         |
| ASV19 | 2770.93959  | 2.8961208      | 0.24488964  | 11.0816862  | 2.26E-05 | 4.98E-04 | 5.3  | Bacteria | Firmicutes      | Chloridia       | Chloridiales       | Chloridiales       | Chloridiales       |         |
| ASV14 | 2101.73144  | 3.87111480     | 0.10861413  | 32.3134023  | 4.30E-05 | 4.98E-04 | 5.3  | Bacteria | Firmicutes      | Chloridia       | Chloridiales       | Chloridiales       | Chloridiales       |         |
| ASV10 | 1201.11318  | 3.13318413     | 0.1497913   | 24.6101031  | 5.07E-05 | 4.98E-04 | 5.3  | Bacteria | Firmicutes      | Chloridia       | Chloridiales       | Chloridiales       | Chloridiales       |         |
| ASV46 | 1613.34397  | 3.12349704     | 0.15813998  | 4.01110077  | 1.33E-04 | 0.0011   | 30.0 | Bacteria | Firmicutes      | Chloridia       | Chloridiales       | Chloridiales       | Chloridiales       |         |
| ASV18 | 2816.60211  | 2.66170658     | 0.26749795  | 8.11100504  | 1.31E-04 | 0.0011   | 30.0 | Bacteria | Firmicutes      | Chloridia       | Chloridiales       | Chloridiales       | Chloridiales       |         |
| ASV2  | 808.641346  | 2.38134423     | 0.13181165  | 35.51310204 | 1.44E-05 | 0.0013   | 30.0 | Bacteria | Firmicutes      | Chloridia       | Chloridiales       | Chloridiales       | Chloridiales       |         |
| ASV3  | 1218.17726  | 3.91662123     | 0.40748959  | 6.59415505  | 1.44E-05 | 0.0013   | 30.0 | Bacteria | Firmicutes      | Chloridia       | Chloridiales       | Chloridiales       | Chloridiales       |         |
| ASV1  | 1611.16345  | 4.45081211     | 0.10581713  | 33.47124179 | 1.77E-05 | 0.0017   | 4.0  | Bacteria | Bacteroidetes   | Bacteroidia     | Bacteroidales      | Bacteroidales      |                    |         |
| ASV21 | 1140.51767  | 2.79870807     | 0.122885107 | 4.66676368  | 1.40E-04 | 0.0017   | 5.3  | Bacteria | Firmicutes      | Chloridia       | Chloridiales       | Chloridiales       | Chloridiales       |         |
| ASV28 | 8578.62624  | 2.50546517     | 0.40678238  | 9.74017909  | 1.81E-05 | 0.0017   | 30.0 | Bacteria | Firmicutes      | Proteobacteria  | Proteobacteriales  | Proteobacteriales  | Chloridiales       |         |
| ASV1  | 1138.34472  | 3.04217177     | 0.16831107  | 27.212434   | 1.60E-04 | 0.0017   | 40.0 | Bacteria | Firmicutes      | Chloridia       | Chloridiales       | Chloridiales       | Chloridiales       |         |
| ASV19 | 178.272202  | 3.46870628     | 0.6249456   | 5.56657078  | 1.90E-04 | 0.0017   | 30.0 | Bacteria | Firmicutes      | Chloridia       | Chloridiales       | Chloridiales       | Chloridiales       |         |
| ASV1  | 1746.05286  | 2.90234951     | 0.17358934  | 7.80528829  | 0.04E-04 | 0.0017   | 5.7  | Bacteria | Firmicutes      | Chloridia       | Chloridiales       | Chloridiales       | Chloridiales       |         |
| ASV26 | 2124.54737  | 2.68740862     | 0.24125462  | 11.53487303 | 2.3E-04  | 0.0021   | 3.0  | Bacteria | Firmicutes      | Chloridia       | Chloridiales       | Chloridiales       | Chloridiales       |         |
| ASV17 | 8026.40958  | 2.55578708     | 0.35021458  | 6.63029133  | 4.30E-05 | 0.0023   | 5.3  | Bacteria | Firmicutes      | Chloridia       | Chloridiales       | Chloridiales       | Chloridiales       |         |
| ASV26 | 2657.77608  | 2.03718258     | 0.35607782  | 5.11265214  | 4.57E-04 | 0.0023   | 30.0 | Bacteria | Firmicutes      | Chloridia       | Chloridiales       | Chloridiales       | Chloridiales       |         |
| ASV10 | 626.62646   | 2.68626284     | 0.17642454  | 4.81284134  | 0.0010   | 0.0023   | 30.0 | Bacteria | Firmicutes      | Chloridia       | Chloridiales       | Chloridiales       | Chloridiales       |         |
| ASV1  | 37732.4144  | 4.02688138     | 0.16218425  | 6.47483738  | 7.44E-04 | 0.0023   | 5.0  | Bacteria | Verrucomicrobia | Verrucomicrobia | Verrucomicrobiales | Verrucomicrobiales | Verrucomicrobiales |         |
| ASV18 | 1615.22320  | 4.26617422     | 0.16759027  | 4.6012073   | 0.0010   | 0.0023   | 5.3  | Bacteria | Firmicutes      | Chloridia       | Chloridiales       | Chloridiales       | Chloridiales       |         |
| ASV15 | 1295.05187  | 2.66166121     | 0.16179004  | 4.57569188  | 0.0010   | 0.0023   | 30.0 | Bacteria | Firmicutes      | Chloridia       | Chloridiales       | Chloridiales       | Chloridiales       |         |
| ASV27 | 10994.1387  | 2.41213347     | 0.15615481  | 9.50480729  | 0.0011   | 0.0028   | 30.0 | Bacteria | Firmicutes      | Mollicutes      | Anaplasmales       | Anaplasmales       | Anaplasmales       |         |
| ASV10 | 1177.60828  | 2.96431115     | 0.09108188  | 32.6081078  | 0.0010   | 0.0028   | 5.3  | Bacteria | Firmicutes      | Chloridia       | Chloridiales       | Chloridiales       | Chloridiales       |         |
| ASV18 | 3113.12841  | 2.45861007     | 0.42308907  | 4.36130709  | 0.0010   | 0.0028   | 30.0 | Bacteria | Firmicutes      | Chloridia       | Chloridiales       | Chloridiales       | Chloridiales       |         |
| ASV13 | 6075.24526  | 2.45861007     | 0.42308907  | 4.36130709  | 0.0010   | 0.0028   | 30.0 | Bacteria | Firmicutes      | Chloridia       | Chloridiales       | Chloridiales       | Chloridiales       |         |
| ASV1  | 9137.83251  | 4.40566565     | 0.131700315 | 7.11200944  | 0.0010   | 0.0029   | 4.0  | Bacteria | Bacteroidetes   | Bacteroidia     | Bacteroidales      | Bacteroidales      | 124.7              |         |
| ASV18 | 684.01138   | 1.87791709     | 0.15481084  | 5.54181227  | 0.0021   | 0.0034   | 5.3  | Bacteria | Firmicutes      | Chloridia       | Chloridiales       | Chloridiales       | Chloridiales       |         |
| ASV4  | 494.466174  | 1.44017128     | 0.18919481  | 3.79747174  | 0.0021   | 0.0034   | 30.0 | Bacteria | Firmicutes      | Chloridia       | Chloridiales       | Chloridiales       | Chloridiales       |         |
| ASV12 | 1778.89124  | 2.51488511     | 0.449515377 | 2.11336621  | 0.0048   | 0.0048   | 4.0  | Bacteria | Firmicutes      | Chloridia       | Chloridiales       | Chloridiales       | Chloridiales       |         |
| ASV15 | 621.370712  | 3.52885624     | 0.15386578  | 3.56656718  | 0.0051   | 0.0070   | 30.0 | Bacteria | Firmicutes      | Chloridia       | Chloridiales       | Chloridiales       | Chloridiales       |         |
| ASV14 | 2058.97941  | 2.40771381     | 0.18787388  | 3.54451096  | 0.0051   | 0.0070   | 30.0 | Bacteria | Firmicutes      | Chloridia       | Chloridiales       | Chloridiales       | Chloridiales       |         |
| ASV16 | 1165.16262  | 2.46607054     | 0.49613858  | 4.51358961  | 0.0058   | 0.0083   | 30.0 | Bacteria | Firmicutes      | Chloridia       | Chloridiales       | Chloridiales       | Chloridiales       |         |
| ASV7  | 1605.51421  | 2.77515151     | 0.5818645   | 2.9518645   | 0.0058   | 0.0083   | 30.0 | Bacteria | Firmicutes      | Chloridia       | Chloridiales       | Chloridiales       | Chloridiales       |         |
| ASV75 | 1819.86428  | 2.61528471     | 0.60507709  | 3.58892903  | 0.0087   | 0.0216   | 5.3  | Bacteria | Firmicutes      | Chloridia       | Chloridiales       | Chloridiales       | Chloridiales       |         |
| ASV16 | 16050.9188  | 1.99651539     | 0.45862134  | 0.00710     | 0.0022   | 0.0216   | 4.0  | Bacteria | Firmicutes      | Chloridia       | Chloridiales       | Chloridiales       | Chloridiales       |         |
| ASV1  | 16489.17349 | 2.48674676     | 0.60232655  | 4.121707734 | 0.0074   | 0.0262   | 5.0  | Bacteria | Firmicutes      | Chloridia       | Chloridiales       | Chloridiales       | Chloridiales       |         |
| ASV28 | 4687.24686  | 2.48674676     | 0.60232655  | 4.121707734 | 0.0074   | 0.0262   | 4.0  | Bacteria | Firmicutes      | Chloridia       | Chloridiales       | Chloridiales       | Chloridiales       |         |
| ASV18 | 8556.91278  | 1.05716318     | 0.48848672  | 4.23881231  | 0.0087   | 0.0262   | 4.0  | Bacteria | Firmicutes      | Chloridia       | Chloridiales       | Chloridiales       | Chloridiales       |         |
| ASV19 | 2107.409129 | 1.93901764     | 0.16133461  | 3.81143888  | 0.00794  | 0.0279   | 30.0 | Bacteria | Firmicutes      | Chloridia       | Chloridiales       | Chloridiales       | Chloridiales       |         |
| ASV10 | 602.1021028 | 2.00202016     | 0.24511198  | 3.12331127  | 0.0027   | 0.031    | 30.0 | Bacteria | Firmicutes      | Chloridia       | Chloridiales       | Chloridiales       | Chloridiales       |         |
| ASV21 | 308.949801  | 2.08618124     | 0.40138911  | 1.00314111  | 0.0012   | 0.0305   | 30.0 | Bacteria | Firmicutes      | Chloridia       | Chloridiales       | Chloridiales       | Chloridiales       |         |
| ASV1  | 2048.19528  | 2.4793118      | 0.44448474  | 3.92510511  | 0.0012   | 0.0312   | 30.0 | Bacteria | Firmicutes      | Chloridia       | Chloridiales       | Chloridiales       | Chloridiales       |         |
| ASV10 | 513.501095  | 3.74989132     | 0.43101434  | 4.01473158  | 0.0103   | 0.0305   | 4.3  | Bacteria | Firmicutes      | Chloridia       | Chloridiales       | Chloridiales       | Chloridiales       |         |
| ASV10 | 618.762055  | 2.2057417      | 0.32008803  | 3.81147179  | 0.0142   | 0.0305   | 4.3  | Bacteria | Firmicutes      | Chloridia       | Chloridiales       | Chloridiales       | Chloridiales       |         |
| ASV18 | 1571.68171  | 3.26212454     | 0.17911459  | 3.71791751  | 0.0144   | 0.0305   | 30.0 | Bacteria | Firmicutes      | Chloridia       | Chloridiales       | Chloridiales       | Chloridiales       |         |
| ASV1  | 684.556161  | 1.51128234     | 0.50189103  | 3.78176175  | 0.0156   | 0.0417   | 4.3  | Bacteria | Firmicutes      | Chloridia       | Chloridiales       | Chloridiales       | Chloridiales       |         |
| ASV2  | 791.124063  | 1.66686128     | 0.59189209  | 2.65448051  | 0.0131   | 0.0431   | 30.0 | Bacteria | Firmicutes      | Chloridia       | Chloridiales       | Chloridiales       | Chloridiales       |         |
| ASV18 | 307.881704  | 1.87664764     | 0.50174405  | 3.72414368  | 0.0170   | 0.0431   | 3.0  | Bacteria | Firmicutes      | Chloridia       | Chloridiales       | Chloridiales       | Chloridiales       |         |
| ASV1  | 4536.75795  | 1.94474631     | 0.42551334  | 3.68209255  | 0.0210   | 0.044    | 3.0  | Bacteria | Actinobacteria  | Actinobacteria  | Actinobacteriales  | Actinobacteriales  | Actinobacteriales  |         |
| ASV28 | 2242.12786  | 1.74017889     | 0.58138884  | 2.86422142  | 0.0276   | 0.0425   | 5.4  | Bacteria | Firmicutes      | Chloridia       | Chloridiales       | Chloridiales       | Chloridiales       |         |
| ASV2  | 986.1166778 | 2.00626588     | 0.471268177 | 3.09739104  | 0.0273   | 0.0425   | 30.0 | Bacteria | Firmicutes      | Chloridia       | Chloridiales       | Chloridiales       | Chloridiales       |         |
| ASV27 | 1458.68695  | 2.2808218      | 0.73874511  | 1.06679773  | 0.0022   | 0.0440   | 5.3  | Bacteria | Firmicutes      | Chloridia       | Chloridiales       | Chloridiales       | Chloridiales       |         |
| ASV13 | 1615.61454  | 4.49019224     | 0.17170928  | 34.17387138 | 1.60E-05 | 0.0017   | 30.0 | Bacteria | Firmicutes      | Chloridia       | Chloridiales       | Chloridiales       | Chloridiales       |         |
| ASV28 | 7997.12474  | 2.30881751     | 0.9943951   | 2.37355642  | 0.0063   | 0.0889   | 30.0 | Bacteria | Firmicutes      | Chloridia       | Chloridiales       | Chloridiales       | Chloridiales       |         |
| ASV1  | 1028.96026  | 1.44691794     | 0.44677544  | 2.95039943  | 0.0077   | 0.0842   | 4.3  | Bacteria | Bacteroidetes   | Bacteroidia     | Bacteroidales      | Bacteroidales      | 124.7              |         |
| ASV10 | 1484.1180   | 3.3142926      | 0.4981788   | 2.75248186  | 0.0028   | 0.0889   | 30.0 | Bacteria | Firmicutes      | Chloridia       | Chloridiales       | Chloridiales       | Chloridiales       |         |
| ASV10 | 2023.7263   | 2.34889788     | 0.82981817  | 2.54808612  | 0.0047   | 0.0917   | 5.3  | Bacteria | Firmicutes      | Chloridia       | Chloridiales       | Chloridiales       | Chloridiales       |         |
| ASV19 | 411.681876  | 2.41034819     | 0.2114012   | 3.049517    | 0.0010   | 0.0917   | 30.0 | Bacteria | Firmicutes      | Chloridia       | Chloridiales       | Chloridiales       | Chloridiales       |         |
| ASV13 | 1105.10811  | 1.30174517     | 0.54110614  | 2.51784767  | 0.0059   | 0.1038   | 5.3  | Bacteria | Firmicutes      | Chloridia       | Chloridiales       | Chloridiales       | Chloridiales       |         |
| ASV18 | 618.762055  | 2.2057417      | 0.32008803  | 3.81147179  | 0.0142   | 0.0305   | 4.3  | Bacteria | Firmicutes      | Chloridia       | Chloridiales       | Chloridiales       | Chloridiales       |         |
| ASV18 | 1571.68171  | 3.26212454     | 0.17911459  | 3.71791751  | 0.0144   | 0.0305   | 30.0 | Bacteria | Firmicutes      | Chloridia       | Chloridiales       | Chloridiales       | Chloridiales       |         |
| ASV1  | 684.556161  | 1.51128234     | 0.50189103  | 3.78176175  | 0.0156   | 0.0417   | 4.3  | Bacteria | Firmicutes      | Chloridia       | Chloridiales       | Chloridiales       | Chloridiales       |         |
| ASV2  | 791.124063  | 1.66686128     | 0.59189209  | 2.65448051  | 0.0131   | 0.0431   | 30.0 | Bacteria | Firmicutes      | Chloridia       | Chloridiales       | Chloridiales       | Chloridiales       |         |
| ASV18 | 307.881704  | 1.87664764     | 0.50174405  | 3.72414368  | 0.0170   | 0.0431   | 3.0  | Bacteria | Firmicutes      | Chloridia       | Chloridiales       | Chloridiales       | Chloridiales       |         |
| ASV1  | 4536.75795  | 1.94474631     | 0.42551334  | 3.68209255  | 0.0210   | 0.044    | 3.0  | Bacteria | Actinobacteria  | Actinobacteria  | Actinobacteriales  | Actinobacteriales  | Actinobacteriales  |         |
| ASV28 | 2242.12786  | 1.74017889     | 0.58138884  | 2.86422142  | 0.0276   | 0.0425   | 5.4  | Bacteria | Firmicutes      | Chloridia       | Chloridiales       | Chloridiales       | Chloridiales       |         |
| ASV2  | 986.1166778 | 2.00626588     | 0.471268177 | 3.09739104  | 0.0273   | 0.0425   | 30.0 | Bacteria | Firmicutes      | Chloridia       | Chloridiales       | Chloridiales</     |                    |         |

**Supplemental Table S6. The difference in the relative abundance of genus-level phylotypes at Week 4 vs. Week 0 for female mice when compared to male mice in response to the HFD**

| Genus           | baseMean    | log2FoldChange | lfcSE       | stat         | pvalue   | padj     | reject | df   |
|-----------------|-------------|----------------|-------------|--------------|----------|----------|--------|------|
| Anaerostipes    | 842.8964607 | -1.188561803   | 0.133147093 | -8.926682353 | 6.74E-06 | 1.55E-04 | TRUE   | 9.4  |
| Akkermansia     | 98358.59354 | 1.399241387    | 0.281689401 | 4.967319965  | 4.49E-04 | 0.004400 | TRUE   | 10.8 |
| Adlercreutzia   | 9847.894305 | -0.479304832   | 0.09011064  | -5.319070343 | 5.74E-04 | 0.004400 | TRUE   | 8.5  |
| Lactococcus     | 5739.419833 | -0.322186431   | 0.086371549 | -3.730237952 | 0.003660 | 0.021046 | TRUE   | 10.4 |
| Enterococcus    | 261.8002784 | -0.755908729   | 0.267928466 | -2.821308021 | 0.010548 | 0.048519 | TRUE   | 20.0 |
| Coprobacillus   | 227.5503865 | -0.544833326   | 0.259858485 | -2.096653972 | 0.048944 | 0.187619 | FALSE  | 20.0 |
| Anaeroplasm     | 6552.106551 | 0.735307637    | 0.346812374 | 2.120188588  | 0.057383 | 0.188543 | FALSE  | 11.1 |
| Oscillospira    | 280893.1121 | 0.313873717    | 0.155798764 | 2.014609802  | 0.072011 | 0.207032 | FALSE  | 9.9  |
| Blautia         | 175.6883915 | -0.154680641   | 0.095457365 | -1.620415988 | 0.133654 | 0.341561 | FALSE  | 10.9 |
| Staphylococcus  | 177.8437491 | -0.173206779   | 0.129256262 | -1.340026213 | 0.207220 | 0.408914 | FALSE  | 11.0 |
| Lactobacillus   | 42206.01208 | -0.410304437   | 0.320365136 | -1.280739979 | 0.230511 | 0.408914 | FALSE  | 9.6  |
| Dehalobacterium | 2645.453738 | 0.281536058    | 0.196100395 | 1.435673083  | 0.183627 | 0.408914 | FALSE  | 9.4  |
| Clostridium     | 2775.089357 | -0.284566533   | 0.230409053 | -1.235049274 | 0.231125 | 0.408914 | FALSE  | 20.0 |
| Bacteroides     | 344755.5625 | -0.18061336    | 0.150486723 | -1.200194651 | 0.255770 | 0.420193 | FALSE  | 10.8 |
| Turicibacter    | 34938.72295 | -0.412229116   | 0.424814293 | -0.970374874 | 0.353572 | 0.542143 | FALSE  | 10.6 |
| Desulfovibrio   | 213.3877209 | 0.305653766    | 0.385248225 | 0.793394352  | 0.436860 | 0.627987 | FALSE  | 20.0 |
| Ruminococcus    | 49070.89278 | 0.097565645    | 0.176531245 | 0.552682022  | 0.591861 | 0.800753 | FALSE  | 10.7 |
| Coproccoccus    | 39751.89935 | 0.056892259    | 0.132520821 | 0.429308076  | 0.676395 | 0.818794 | FALSE  | 10.5 |
| Dorea           | 1067.47391  | 0.231691815    | 0.53248929  | 0.43511075   | 0.672639 | 0.818794 | FALSE  | 10.1 |
| Sutterella      | 3754.901108 | 0.144152723    | 0.438269425 | 0.328913484  | 0.748444 | 0.860711 | FALSE  | 10.9 |
| [Ruminococcus]  | 74996.91209 | 0.050964589    | 0.204095595 | 0.249709402  | 0.808106 | 0.885068 | FALSE  | 9.5  |
| Roseburia       | 227.3909268 | -0.035197707   | 0.3211398   | -0.109602445 | 0.913817 | 0.955354 | FALSE  | 20.0 |
| Butyriricoccus  | 519.3959342 | 0.005291339    | 0.504813283 | 0.010481775  | 0.991741 | 0.991741 | FALSE  | 20.0 |

Abbreviations: lfcSE, log2FoldChange standard error; padj, FDR corrected p-value; df, degrees of freedom.

Notes. Estimates were obtained from bias-corrected centered log2-ratio transformed regression as implemented in LinDA.

baseMean reflects the normalized average read count. Stat is the log2FoldChange / lfcSE.

Model degrees of freedom computed using the Satterthwaite approximation as implemented in lmerTest.

**Supplemental Table S7. The difference in the relative abundance of amplicon sequence variants (ASV) at Week 4 vs. Week 0 for female mice when compared to male mice in response to the HFD**

| ASV   | baseMean  | log2FoldChange | lfcSE  | stat     | probadj | padj   | df   | Kingdom       | Phylum        | Class        | Order          | Family          | Genus        | Species |
|-------|-----------|----------------|--------|----------|---------|--------|------|---------------|---------------|--------------|----------------|-----------------|--------------|---------|
| ASV24 | 725.5551  | -2.5995        | 0.2695 | -9.6823  | 0.0000  | 0.0000 | 22   | Bacteria      | Chloroflexi   | Chloroflexia | Chloroflexales | Chloroflexaceae | Chloroflexus |         |
| ASV24 | 487.8548  | -2.1202        | 0.0715 | -29.4897 | 0.0000  | 0.0000 | 22   | Bacteria      | Chloroflexi   | Chloroflexia | Chloroflexales | Chloroflexaceae | Chloroflexus |         |
| ASV24 | 866.1762  | -2.4947        | 0.2797 | -9.0047  | 0.0000  | 0.0000 | 8.3  | Bacteria      | Chloroflexi   | Chloroflexia | Chloroflexales | Chloroflexaceae | Chloroflexus |         |
| ASV29 | 899.8869  | -2.0622        | 0.2680 | -7.7153  | 0.0000  | 0.0000 | 7.6  | Bacteria      | Chloroflexi   | Chloroflexia | Chloroflexales | Chloroflexaceae | Chloroflexus |         |
| ASV1  | 300.1477  | -2.0985        | 0.2700 | -7.7653  | 0.0001  | 0.0001 | 9.0  | Bacteria      | Chloroflexi   | Chloroflexia | Chloroflexales | Chloroflexaceae | Chloroflexus |         |
| ASV19 | 489.1515  | -1.8874        | 0.2876 | -6.5679  | 0.0004  | 0.0134 | 20.0 | Bacteria      | Chloroflexi   | Chloroflexia | Chloroflexales | Chloroflexaceae | Chloroflexus |         |
| ASV13 | 495.7575  | -0.7553        | 0.1055 | -7.1597  | 0.0001  | 0.0134 | 20.0 | Bacteria      | Chloroflexi   | Chloroflexia | Chloroflexales | Chloroflexaceae | Chloroflexus |         |
| ASV14 | 589.7798  | -1.1261        | 0.2700 | -4.1884  | 0.0002  | 0.0134 | 20.0 | Bacteria      | Chloroflexi   | Chloroflexia | Chloroflexales | Chloroflexaceae | Chloroflexus |         |
| ASV15 | 514.5112  | -1.2103        | 0.2695 | -4.5087  | 0.0001  | 0.0134 | 20.0 | Bacteria      | Chloroflexi   | Chloroflexia | Chloroflexales | Chloroflexaceae | Chloroflexus |         |
| ASV15 | 1108.1800 | -1.1289        | 0.3111 | -3.6254  | 0.0007  | 0.0132 | 20.0 | Bacteria      | Chloroflexi   | Chloroflexia | Chloroflexales | Chloroflexaceae | Chloroflexus |         |
| ASV26 | 495.4812  | -1.2684        | 0.2695 | -4.7079  | 0.0001  | 0.0134 | 20.0 | Bacteria      | Chloroflexi   | Chloroflexia | Chloroflexales | Chloroflexaceae | Chloroflexus |         |
| ASV26 | 434.5101  | -1.1411        | 0.3148 | -3.6254  | 0.0007  | 0.0132 | 20.0 | Bacteria      | Chloroflexi   | Chloroflexia | Chloroflexales | Chloroflexaceae | Chloroflexus |         |
| ASV29 | 1114.0201 | -1.0652        | 0.3090 | -3.4381  | 0.0010  | 0.0145 | 11.7 | Bacteria      | Chloroflexi   | Chloroflexia | Chloroflexales | Chloroflexaceae | Chloroflexus |         |
| ASV14 | 1398.1865 | -1.0591        | 0.3095 | -3.4053  | 0.0010  | 0.0145 | 11.7 | Bacteria      | Chloroflexi   | Chloroflexia | Chloroflexales | Chloroflexaceae | Chloroflexus |         |
| ASV10 | 518.7188  | -0.5119        | 0.2695 | -1.9319  | 0.0002  | 0.0134 | 20.0 | Bacteria      | Chloroflexi   | Chloroflexia | Chloroflexales | Chloroflexaceae | Chloroflexus |         |
| ASV28 | 945.9459  | -1.6701        | 0.4612 | -3.6213  | 0.0004  | 0.0005 | 10.0 | Bacteria      | Chloroflexi   | Chloroflexia | Chloroflexales | Chloroflexaceae | Chloroflexus |         |
| ASV18 | 1514.3013 | -2.7405        | 0.3176 | -8.6301  | 0.0000  | 0.0000 | 11.1 | Bacteria      | Chloroflexi   | Chloroflexia | Chloroflexales | Chloroflexaceae | Chloroflexus |         |
| ASV17 | 495.1414  | -1.0394        | 0.1055 | -9.7291  | 0.0000  | 0.0000 | 9.0  | Bacteria      | Chloroflexi   | Chloroflexia | Chloroflexales | Chloroflexaceae | Chloroflexus |         |
| ASV28 | 778.5107  | -1.1178        | 0.4085 | -2.7384  | 0.0004  | 0.0004 | 20.0 | Bacteria      | Chloroflexi   | Chloroflexia | Chloroflexales | Chloroflexaceae | Chloroflexus |         |
| ASV11 | 1315.0007 | -1.6111        | 0.3018 | -5.3378  | 0.0002  | 0.0004 | 7.1  | Bacteria      | Chloroflexi   | Chloroflexia | Chloroflexales | Chloroflexaceae | Chloroflexus |         |
| ASV13 | 2207.884  | -1.3078        | 0.4027 | -3.2458  | 0.0002  | 0.0004 | 20.0 | Bacteria      | Chloroflexi   | Chloroflexia | Chloroflexales | Chloroflexaceae | Chloroflexus |         |
| ASV4  | 2207.884  | -1.3078        | 0.4027 | -3.2458  | 0.0002  | 0.0004 | 20.0 | Bacteria      | Chloroflexi   | Chloroflexia | Chloroflexales | Chloroflexaceae | Chloroflexus |         |
| ASV4  | 386.7920  | -0.8480        | 0.3020 | -2.7974  | 0.0112  | 0.0742 | 20.0 | Bacteria      | Chloroflexi   | Chloroflexia | Chloroflexales | Chloroflexaceae | Chloroflexus |         |
| ASV19 | 1020.1100 | -0.9386        | 0.2785 | -3.3691  | 0.0001  | 0.0001 | 10.0 | Bacteria      | Chloroflexi   | Chloroflexia | Chloroflexales | Chloroflexaceae | Chloroflexus |         |
| ASV1  | 2351.3371 | -1.1105        | 0.4526 | -2.454   | 0.0140  | 0.0888 | 20.0 | Bacteroidetes | Bacteroidia   | Bacteroidia  | Bacteroidia    | Bacteroidia     | Sub-7        |         |
| ASV2  | 1104.1786 | -1.0404        | 0.3095 | -3.3404  | 0.0010  | 0.0145 | 11.7 | Bacteria      | Chloroflexi   | Chloroflexia | Chloroflexales | Chloroflexaceae | Chloroflexus |         |
| ASV2  | 1052.6911 | -1.2621        | 0.4505 | -2.7974  | 0.0112  | 0.0742 | 9.3  | Bacteria      | Chloroflexi   | Bacteroidia  | Bacteroidia    | Bacteroidia     | Sub-7        |         |
| ASV1  | 779.1006  | -1.2706        | 0.2695 | -4.7359  | 0.0001  | 0.0134 | 20.0 | Bacteria      | Chloroflexi   | Chloroflexia | Chloroflexales | Chloroflexaceae | Chloroflexus |         |
| ASV21 | 411.8841  | -1.1092        | 0.4114 | -2.6844  | 0.0249  | 0.1277 | 9.3  | Bacteria      | Chloroflexi   | Chloroflexia | Chloroflexales | Chloroflexaceae | Chloroflexus |         |
| ASV8  | 1205.1611 | -1.2684        | 0.4505 | -2.7974  | 0.0112  | 0.0742 | 9.3  | Bacteria      | Chloroflexi   | Chloroflexia | Chloroflexales | Chloroflexaceae | Chloroflexus |         |
| ASV10 | 1108.7671 | -0.8480        | 0.3020 | -2.7974  | 0.0112  | 0.0742 | 10.0 | Bacteria      | Chloroflexi   | Chloroflexia | Chloroflexales | Chloroflexaceae | Chloroflexus |         |
| ASV17 | 495.1414  | -1.0394        | 0.1055 | -9.7291  | 0.0000  | 0.0000 | 9.0  | Bacteria      | Chloroflexi   | Chloroflexia | Chloroflexales | Chloroflexaceae | Chloroflexus |         |
| ASV28 | 1177.1508 | -1.1105        | 0.4870 | -2.3101  | 0.0001  | 0.0001 | 10.0 | Bacteria      | Chloroflexi   | Chloroflexia | Chloroflexales | Chloroflexaceae | Chloroflexus |         |
| ASV1  | 1052.6911 | -1.2621        | 0.4505 | -2.7974  | 0.0112  | 0.0742 | 9.3  | Bacteria      | Chloroflexi   | Chloroflexia | Chloroflexales | Chloroflexaceae | Chloroflexus |         |
| ASV8  | 134.7468  | -0.7134        | 0.1403 | -5.1108  | 0.0000  | 0.0000 | 9.0  | Bacteria      | Chloroflexi   | Chloroflexia | Chloroflexales | Chloroflexaceae | Chloroflexus |         |
| ASV10 | 495.1414  | -1.0394        | 0.1055 | -9.7291  | 0.0000  | 0.0000 | 9.0  | Bacteria      | Chloroflexi   | Chloroflexia | Chloroflexales | Chloroflexaceae | Chloroflexus |         |
| ASV19 | 1430.9470 | -0.9171        | 0.4085 | -2.238   | 0.0084  | 0.1138 | 8.8  | Bacteria      | Bacteroidetes | Bacteroidia  | Bacteroidia    | Bacteroidia     | Bacteroidia  |         |
| ASV10 | 768.1171  | -0.9171        | 0.4085 | -2.238   | 0.0084  | 0.1138 | 8.8  | Bacteria      | Bacteroidetes | Bacteroidia  | Bacteroidia    | Bacteroidia     | Bacteroidia  |         |
| ASV14 | 486.6477  | -0.9171        | 0.4085 | -2.238   | 0.0084  | 0.1138 | 8.8  | Bacteria      | Bacteroidetes | Bacteroidia  | Bacteroidia    | Bacteroidia     | Bacteroidia  |         |
| ASV8  | 1104.1786 | -0.9171        | 0.4085 | -2.238   | 0.0084  | 0.1138 | 8.8  | Bacteria      | Bacteroidetes | Bacteroidia  | Bacteroidia    | Bacteroidia     | Bacteroidia  |         |
| ASV8  | 1104.1786 | -0.9171        | 0.4085 | -2.238   | 0.0084  | 0.1138 | 8.8  | Bacteria      | Bacteroidetes | Bacteroidia  | Bacteroidia    | Bacteroidia     | Bacteroidia  |         |
| ASV27 | 2118.1117 | -1.4574        | 0.5124 | -2.8455  | 0.0007  | 0.0007 | 11.1 | Bacteria      | Chloroflexi   | Chloroflexia | Chloroflexales | Chloroflexaceae | Chloroflexus |         |
| ASV2  | 1052.6911 | -1.2621        | 0.4505 | -2.7974  | 0.0112  | 0.0742 | 9.3  | Bacteria      | Chloroflexi   | Chloroflexia | Chloroflexales | Chloroflexaceae | Chloroflexus |         |
| ASV10 | 1108.7671 | -0.8480        | 0.3020 | -2.7974  | 0.0112  | 0.0742 | 10.0 | Bacteria      | Chloroflexi   | Chloroflexia | Chloroflexales | Chloroflexaceae | Chloroflexus |         |
| ASV24 | 1344.3405 | -0.9171        | 0.4085 | -2.238   | 0.0084  | 0.1138 | 8.8  | Bacteria      | Chloroflexi   | Chloroflexia | Chloroflexales | Chloroflexaceae | Chloroflexus |         |
| ASV24 | 1344.3405 | -0.9171        | 0.4085 | -2.238   | 0.0084  | 0.1138 | 8.8  | Bacteria      | Chloroflexi   | Chloroflexia | Chloroflexales | Chloroflexaceae | Chloroflexus |         |
| ASV1  | 1052.6911 | -1.2621        | 0.4505 | -2.7974  | 0.0112  | 0.0742 | 9.3  | Bacteria      | Chloroflexi   | Chloroflexia | Chloroflexales | Chloroflexaceae | Chloroflexus |         |
| ASV10 | 1108.7671 | -0.8480        | 0.3020 | -2.7974  | 0.0112  | 0.0742 | 10.0 | Bacteria      | Chloroflexi   | Chloroflexia | Chloroflexales | Chloroflexaceae | Chloroflexus |         |
| ASV19 | 1430.9470 | -0.9171        | 0.4085 | -2.238   | 0.0084  | 0.1138 | 8.8  | Bacteria      | Bacteroidetes | Bacteroidia  | Bacteroidia    | Bacteroidia     | Bacteroidia  |         |
| ASV10 | 768.1171  | -0.9171        | 0.4085 | -2.238   | 0.0084  | 0.1138 | 8.8  | Bacteria      | Bacteroidetes | Bacteroidia  | Bacteroidia    | Bacteroidia     | Bacteroidia  |         |
| ASV14 | 486.6477  | -0.9171        | 0.4085 | -2.238   | 0.0084  | 0.1138 | 8.8  | Bacteria      | Bacteroidetes | Bacteroidia  | Bacteroidia    | Bacteroidia     | Bacteroidia  |         |
| ASV8  | 1104.1786 | -0.9171        | 0.4085 | -2.238   | 0.0084  | 0.1138 | 8.8  | Bacteria      | Bacteroidetes | Bacteroidia  | Bacteroidia    | Bacteroidia     | Bacteroidia  |         |
| ASV10 | 1108.7671 | -0.8480        | 0.3020 | -2.7974  | 0.0112  | 0.0742 | 10.0 | Bacteria      | Chloroflexi   | Chloroflexia | Chloroflexales | Chloroflexaceae | Chloroflexus |         |
| ASV18 | 1052.6911 | -1.2621        | 0.4505 | -2.7974  | 0.0112  | 0.0742 | 9.3  | Bacteria      | Chloroflexi   | Chloroflexia | Chloroflexales | Chloroflexaceae | Chloroflexus |         |
| ASV25 | 211.1111  | -0.8480        | 0.4108 | -2.049   | 0.0000  | 0.0000 | 20.0 | Bacteria      | Chloroflexi   | Chloroflexia | Chloroflexales | Chloroflexaceae | Chloroflexus |         |
| ASV18 | 495.1414  | -1.0394        | 0.1055 | -9.7291  | 0.0000  | 0.0000 | 9.0  | Bacteria      | Chloroflexi   | Chloroflexia | Chloroflexales | Chloroflexaceae | Chloroflexus |         |
| ASV28 | 1177.1508 | -1.1105        | 0.4870 | -2.3101  | 0.0001  | 0.0001 | 10.0 | Bacteria      | Chloroflexi   | Chloroflexia | Chloroflexales | Chloroflexaceae | Chloroflexus |         |
| ASV1  | 1052.6911 | -1.2621        | 0.4505 | -2.7974  | 0.0112  | 0.0742 | 9.3  | Bacteria      | Chloroflexi   | Chloroflexia | Chloroflexales | Chloroflexaceae | Chloroflexus |         |
| ASV8  | 134.7468  | -0.7134        | 0.1403 | -5.1108  | 0.0000  | 0.0000 | 9.0  | Bacteria      | Chloroflexi   | Chloroflexia | Chloroflexales | Chloroflexaceae | Chloroflexus |         |
| ASV10 | 495.1414  | -1.0394        | 0.1055 | -9.7291  | 0.0000  | 0.0000 | 9.0  | Bacteria      | Chloroflexi   | Chloroflexia | Chloroflexales | Chloroflexaceae | Chloroflexus |         |
| ASV19 | 1430.9470 | -0.9171        | 0.4085 | -2.238   | 0.0084  | 0.1138 | 8.8  | Bacteria      | Bacteroidetes | Bacteroidia  | Bacteroidia    | Bacteroidia     | Bacteroidia  |         |
| ASV10 | 768.1171  | -0.9171        | 0.4085 | -2.238   | 0.0084  | 0.1138 | 8.8  | Bacteria      | Bacteroidetes | Bacteroidia  | Bacteroidia    | Bacteroidia     | Bacteroidia  |         |
| ASV14 | 486.6477  | -0.9171        | 0.4085 | -2.238   | 0.0084  | 0.1138 | 8.8  | Bacteria      | Bacteroidetes | Bacteroidia  | Bacteroidia    | Bacteroidia     | Bacteroidia  |         |
| ASV8  | 1104.1786 | -0.9171        | 0.4085 | -2.238   | 0.0084  | 0.1138 | 8.8  | Bacteria      | Bacteroidetes | Bacteroidia  | Bacteroidia    | Bacteroidia     | Bacteroidia  |         |
| ASV10 | 1108.7671 | -0.8480        | 0.3020 | -2.7974  | 0.0112  | 0.0742 | 10.0 | Bacteria      | Chloroflexi   | Chloroflexia | Chloroflexales | Chloroflexaceae | Chloroflexus |         |
| ASV18 | 1052.6911 | -1.2621        | 0.4505 | -2.7974  | 0.0112  | 0.0742 | 9.3  | Bacteria      | Chloroflexi   | Chloroflexia | Chloroflexales | Chloroflexaceae | Chloroflexus |         |
| ASV25 | 211.1111  | -0.8480        | 0.4108 | -2.049   | 0.0000  | 0.0000 | 20.0 | Bacteria      | Chloroflexi   | Chloroflexia | Chloroflexales | Chloroflexaceae | Chloroflexus |         |
| ASV18 | 495.1414  | -1.0394        | 0.1055 | -9.7291  | 0.0000  | 0.0000 | 9.0  | Bacteria      | Chloroflexi   | Chloroflexia | Chloroflexales | Chloroflexaceae | Chloroflexus |         |
| ASV28 | 1177.1508 | -1.1105        | 0.4870 | -2.3101  | 0.0001  | 0.0001 | 10.0 | Bacteria      | Chloroflexi   | Chloroflexia | Chloroflexales | Chloroflexaceae | Chloroflexus |         |
| ASV1  | 1052.6911 | -1.2621        | 0.4505 | -2.7974  | 0.0112  | 0.0742 | 9.3  | Bacteria      | Chloroflexi   | Chloroflexia | Chloroflexales | Chloroflexaceae | Chloroflexus |         |
| ASV8  | 134.7468  | -0.7134        | 0.1403 | -5.1108  | 0.0000  | 0.0000 | 9.0  | Bacteria      | Chloroflexi   | Chloroflexia | Chloroflexales | Chloroflexaceae | Chloroflexus |         |
| ASV10 | 495.1414  | -1.0394        | 0.1055 | -9.7291  | 0.0000  | 0.0000 | 9.0  | Bacteria      | Chloroflexi   | Chloroflexia | Chloroflexales | Chloroflexaceae | Chloroflexus |         |
| ASV19 | 1430.9470 | -0.9171        | 0.4085 | -2.238   | 0.0084  | 0.1138 | 8.8  | Bacteria      | Bacteroidetes | Bacteroidia  | Bacteroidia    | Bacteroidia     | Bacteroidia  |         |
| ASV10 | 768.1171  | -0.9171        | 0.4085 | -2.238   | 0.0084  | 0.1138 | 8.8  | Bacteria      | Bacteroidetes | Bacteroidia  | Bacteroidia    | Bacteroidia     | Bacteroidia  |         |
| ASV14 | 486.6477  | -0.9171        | 0.4085 | -2.238   | 0.0084  | 0.1138 | 8.8  | Bacteria      | Bacteroidetes | Bacteroidia  | Bacteroidia    | Bacteroidia     | Bacteroidia  |         |
| ASV8  | 1104.1786 | -0.9171        | 0.4085 | -2.238   | 0.0084  | 0.1138 | 8.8  | Bacteria      | Bacteroidetes | Bacteroidia  | Bacteroidia    | Bacteroidia     | Bacteroidia  |         |
| ASV10 | 1108.7671 | -0.8480        | 0.3020 | -2.7974  | 0.0112  | 0.0742 | 10.0 | Bacteria      | Chloroflexi   | Chloroflexia | Chloroflexales | Chloroflexaceae | Chloroflexus |         |
| ASV18 | 1052.6911 | -1.2621        | 0.4505 | -2.7974  | 0.0112  | 0.0742 | 9.3  | Bacteria      | Chloroflexi   | Chloroflexia | Chloroflexales | Chloroflexaceae | Chloroflexus |         |
| ASV25 | 211.1111  | -0.8480        | 0.4108 | -2.049   | 0.0000  | 0.0000 | 20.0 | Bacteria      | Chloroflexi   | Chloroflexia | Chloroflexales | Chloroflexaceae | Chloroflexus |         |
| ASV18 | 495.1414  | -1.0394        | 0.1055 | -9.7291  | 0.0000  | 0.0000 | 9.0  | Bacteria      | Chloroflexi   | Chloroflexia | Chloroflexales | Chloroflexaceae | Chloroflexus |         |
| ASV28 | 1177.1508 | -1.1105        | 0.4870 | -2.3101  | 0.0001  | 0.0001 | 10.0 | Bacteria      | Chloroflexi   | Chloroflexia | Chloroflexales | Chloroflexaceae | Chloroflexus |         |
| ASV1  | 1052.6911 | -1.2621        | 0.4505 | -2.7974  | 0.0112  | 0.0742 | 9.3  | Bacteria      | Chloroflexi   |              |                |                 |              |         |

Model degrees of freedom computed using the Satterthwaite approximation as implemented in lmerTest.
